# Supplementary material for: Insights from Bacteroides Species in Children with Type 1 Diabetes
Source: MDPI journal article supplement (doi:10.3390/microorganisms9071436), 2021-07-02
Supplement: s1 [file s1]

(a)

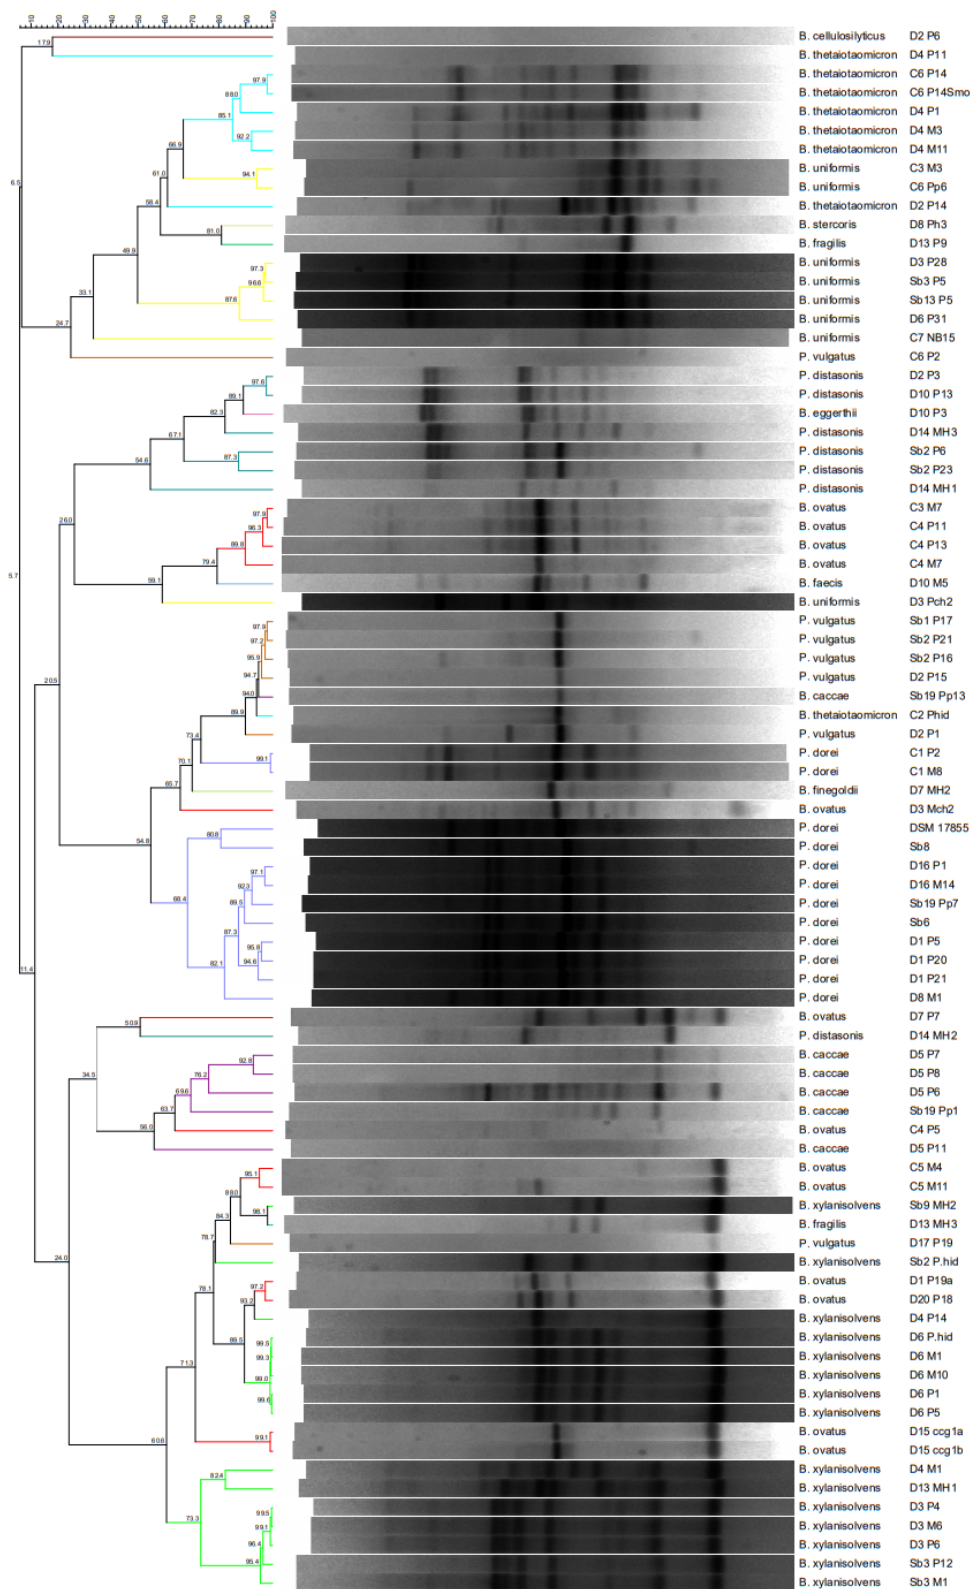

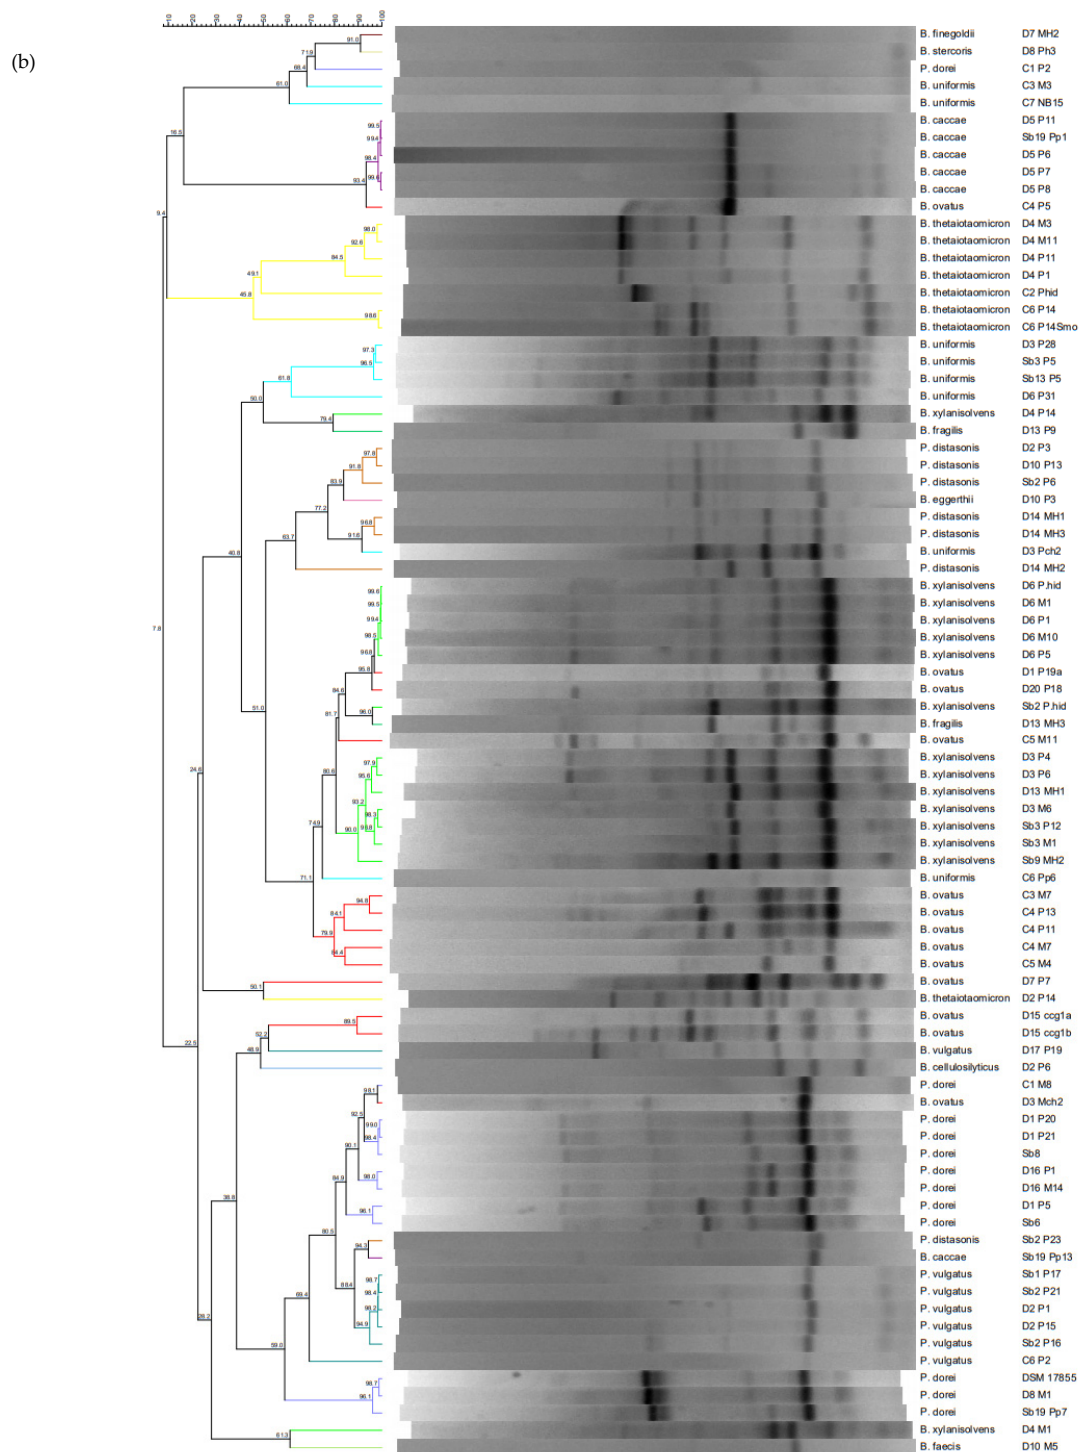

**Figure S2.** Cluster analysis by BOX rep-PCR (a) and ERIC rep-PCR (b) of *Bacteroides* species, *Phocaicola dorei* and *Parabacteroides distasonis* isolated from T1D and Control children. Similarity values (%).
