# Supplementary material for: Insights from Bacteroides Species in Children with Type 1 Diabetes
Source: MDPI journal article supplement (doi:10.3390/microorganisms9071436), 2021-07-02
Supplement: s1 [file s1]

Figure S1

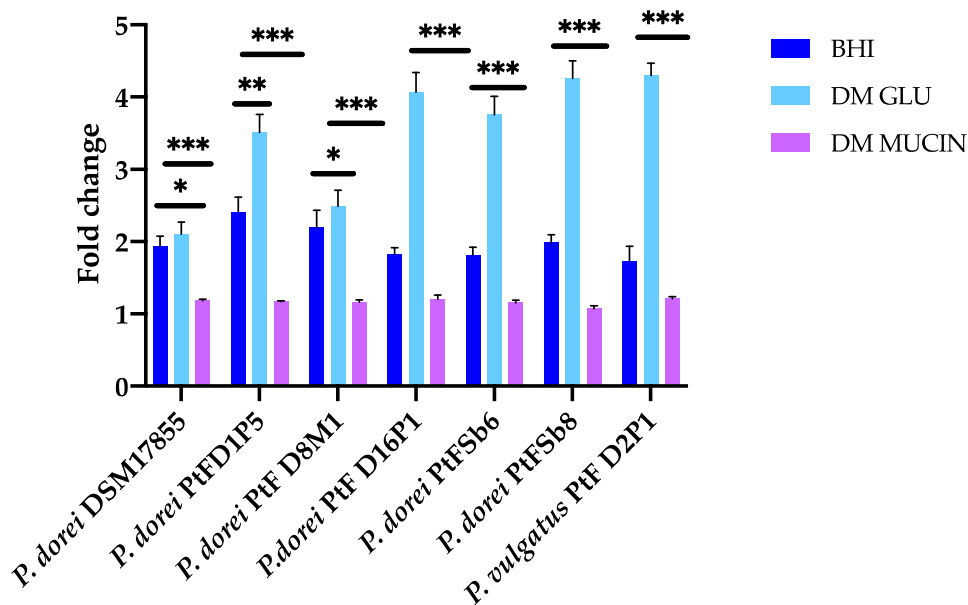

**Figure S1.** Growth in Brain Heart Infusion (BHI), Defined medium with glucose (DM GLU) and Defined medium supplemented with porcine gastric mucin (1 %, w/v) (DM MUCIN).
